# Supplementary material for: Shenlian (SL) Decoction, a Traditional Chinese Medicine Compound, May Ameliorate Blood Glucose via Mediating the Gut Microbiota in db/db Mice
Source: PubMed Central journal article supplement (PMC8855168; doi:10.1155/2022/7802107), 2022-02-09
Supplement: 7802107.f1.pdf [file 7802107.f1.pdf]

| Phylum                           | Family                           | Genus                              | Species                                             | OTU    |
|----------------------------------|----------------------------------|------------------------------------|-----------------------------------------------------|--------|
| Firmicutes                       | Lachnospiraceae                  | Lachnoclostridium                  | [Clostridium]_aldenense                             | OTU854 |
| Firmicutes                       | Ruminococcaceae                  | GCA-900066225                      | unclassified_g_GCA-900066225                        | OTU928 |
| Bacteroidetes                    | unclassified_o_Bacteroidales     | unclassified_o_Bacteroidales       | unclassified_o_Bacteroidales                        | OTU695 |
| unclassified_k_norank_d_Bacteria | unclassified_k_norank_d_Bacteria | unclassified_k_norank_d_Bacteria   | unclassified_k_norank_d_Bacteria                    | OTU856 |
| Bacteroidetes                    | Muribaculaceae                   | norank_f_Muribaculaceae            | uncultured_bacterium_g_norank_f_Muribaculaceae      | OTU925 |
| Bacteroidetes                    | Muribaculaceae                   | norank_f_Muribaculaceae            | uncultured_bacterium_g_norank_f_Muribaculaceae      | OTU920 |
| Firmicutes                       | Lachnospiraceae                  | Lachnoclostridium                  | unclassified_g_Lachnoclostridium                    | OTU810 |
| Firmicutes                       | Lachnospiraceae                  | Hungatella                         | uncultured_bacterium_g_Hungatella                   | OTU735 |
| Bacteroidetes                    | Rikenellaceae                    | Alistipes                          | unclassified_g_Alistipes                            | OTU837 |
| Bacteroidetes                    | Tannerellaceae                   | Parabacteroides                    | unclassified_g_Parabacteroides                      | OTU765 |
| Bacteroidetes                    | unclassified_o_Bacteroidales     | unclassified_o_Bacteroidales       | unclassified_o_Bacteroidales                        | OTU960 |
| Bacteroidetes                    | Bacteroidaceae                   | Bacteroides                        | unclassified_g_Bacteroides                          | OTU924 |
| Bacteroidetes                    | unclassified_o_Bacteroidales     | unclassified_o_Bacteroidales       | unclassified_o_Bacteroidales                        | OTU923 |
| Proteobacteria                   | Enterobacteriaceae               | Klebsiella                         | Klebsiella_pneumoniae_subsp_pneumoniae_g_Klebsiella | OTU896 |
| Firmicutes                       | Lachnospiraceae                  | [Ruminococcus]_gnavus_group        | uncultured_bacterium_g_[Ruminococcus]_gnavus_group  | OTU892 |
| Firmicutes                       | Lachnospiraceae                  | Robinsoniella                      | Robinsoniella_peoriensis_g_Robinsoniella            | OTU914 |
| Bacteroidetes                    | unclassified_o_Bacteroidales     | unclassified_o_Bacteroidales       | unclassified_o_Bacteroidales                        | OTU487 |
| Bacteroidetes                    | Bacteroidaceae                   | Bacteroides                        | unclassified_g_Bacteroides                          | OTU855 |
| Bacteroidetes                    | Bacteroidaceae                   | Bacteroides                        | unclassified_g_Bacteroides                          | OTU857 |
| Firmicutes                       | Lachnospiraceae                  | Anaerostipes                       | Anaerostipes_caccae                                 | OTU748 |
| Bacteroidetes                    | Muribaculaceae                   | norank_f_Muribaculaceae            | uncultured_bacterium_g_norank_f_Muribaculaceae      | OTU852 |
| Proteobacteria                   | norank_o_Rhodospirillales        | norank_f_norank_o_Rhodospirillales | gut_metagenome_g_norank_f_norank_o_Rhodospirillales | OTU895 |
| Bacteroidetes                    | Bacteroidaceae                   | Bacteroides                        | Bacteroides_caecimuris                              | OTU802 |
| Bacteroidetes                    | Tannerellaceae                   | Parabacteroides                    | unclassified_g_Parabacteroides                      | OTU758 |
| Firmicutes                       | Ruminococcaceae                  | Flavonifractor                     | unclassified_g_Flavonifractor                       | OTU766 |
| Bacteroidetes                    | Bacteroidaceae                   | Bacteroides                        | unclassified_g_Bacteroides                          | OTU768 |
| Firmicutes                       | Lachnospiraceae                  | Hungatella                         | uncultured_organism_g_Hungatella                    | OTU844 |
| Bacteroidetes                    | unclassified_o_Bacteroidales     | unclassified_o_Bacteroidales       | unclassified_o_Bacteroidales                        | OTU948 |
| Firmicutes                       | Erysipelotrichaceae              | Coprobacillus                      | Coprobacillus_cateniformis                          | OTU738 |
| Bacteroidetes                    | Bacteroidaceae                   | Bacteroides                        | Bacteroides_acidifaciens                            | OTU744 |
| Verrucomicrobia                  | Akkermansiaceae                  | Akkermansia                        | unclassified_g_Akkermansia                          | OTU691 |
| Bacteroidetes                    | unclassified_o_Bacteroidales     | unclassified_o_Bacteroidales       | unclassified_o_Bacteroidales                        | OTU908 |
| Firmicutes                       | Peptostreptococcaceae            | Clostridioides                     | Clostridioides_difficile_g_Clostridioides           | OTU877 |
| Firmicutes                       | Lachnospiraceae                  | Lachnoclostridium                  | unclassified_g_Lachnoclostridium                    | OTU876 |
| Bacteroidetes                    | Muribaculaceae                   | norank_f_Muribaculaceae            | unclassified_g_norank_f_Muribaculaceae              | OTU915 |
| Bacteroidetes                    | Muribaculaceae                   | norank_f_Muribaculaceae            | unclassified_g_norank_f_Muribaculaceae              | OTU849 |
| Verrucomicrobia                  | Akkermansiaceae                  | Akkermansia                        | Akkermansia_muciniphila                             | OTU890 |
