# Supplementary material for: Shenlian (SL) Decoction, a Traditional Chinese Medicine Compound, May Ameliorate Blood Glucose via Mediating the Gut Microbiota in db/db Mice
Source: PubMed Central journal article supplement (PMC8855168; doi:10.1155/2022/7802107), 2022-02-09
Supplement: 7802107.f2.pdf [file 7802107.f2.pdf]

| Phylum         | Family                       | Genus                          | Species                                                      | OTU    |
|----------------|------------------------------|--------------------------------|--------------------------------------------------------------|--------|
| Bacteroidetes  | Muribaculaceae               | norank_f_Muribaculaceae        | uncultured_bacterium_g_norank_f_Muribaculaceae               | OTU386 |
| Bacteroidetes  | Rikenellaceae                | Alistipes                      | uncultured_bacterium_g_Alistipes                             | OTU432 |
| Actinobacteria | Bifidobacteriaceae           | Bifidobacterium                | unclassified_g_Bifidobacterium                               | OTU395 |
| Firmicutes     | Lachnospiraceae              | Lachnospiraceae_UCG-001        | uncultured_bacterium_g_Lachnospiraceae_UCG-001               | OTU531 |
| Firmicutes     | Streptococcaceae             | Streptococcus                  | unclassified_g_Streptococcus                                 | OTU761 |
| Bacteroidetes  | Muribaculaceae               | norank_f_Muribaculaceae        | uncultured_bacterium_g_norank_f_Muribaculaceae               | OTU17  |
| Bacteroidetes  | Muribaculaceae               | norank_f_Muribaculaceae        | uncultured_bacterium_g_norank_f_Muribaculaceae               | OTU18  |
| Bacteroidetes  | unclassified_o_Bacteroidales | unclassified_o_Bacteroidales   | unclassified_o_Bacteroidales                                 | OTU99  |
| Bacteroidetes  | Muribaculaceae               | norank_f_Muribaculaceae        | uncultured_bacterium_g_norank_f_Muribaculaceae               | OTU1   |
| Firmicutes     | Ruminococcaceae              | unclassified_f_Ruminococcaceae | unclassified_f_Ruminococcaceae                               | OTU458 |
| Bacteroidetes  | Muribaculaceae               | norank_f_Muribaculaceae        | uncultured_bacterium_g_norank_f_Muribaculaceae               | OTU507 |
| Bacteroidetes  | Muribaculaceae               | norank_f_Muribaculaceae        | uncultured_bacterium_g_norank_f_Muribaculaceae               | OTU136 |
| Bacteroidetes  | Muribaculaceae               | norank_f_Muribaculaceae        | uncultured_bacterium_g_norank_f_Muribaculaceae               | OTU133 |
| Firmicutes     | Christensenellaceae          | Christensenellaceae_R-7_group  | bacterium_YE57                                               | OTU202 |
| Firmicutes     | Ruminococcaceae              | Anaerotruncus                  | uncultured_bacterium_g_Anaerotruncus                         | OTU333 |
| Bacteroidetes  | Prevotellaceae               | Prevotellaceae_UCG-001         | uncultured_Bacteroidales_bacterium_g_Prevotellaceae_UCG-001  | OTU628 |
| Bacteroidetes  | Muribaculaceae               | norank_f_Muribaculaceae        | uncultured_bacterium_g_norank_f_Muribaculaceae               | OTU181 |
| Bacteroidetes  | Muribaculaceae               | norank_f_Muribaculaceae        | uncultured_bacterium_g_norank_f_Muribaculaceae               | OTU598 |
| Bacteroidetes  | Muribaculaceae               | norank_f_Muribaculaceae        | uncultured_bacterium_g_norank_f_Muribaculaceae               | OTU182 |
| Bacteroidetes  | Muribaculaceae               | norank_f_Muribaculaceae        | uncultured_bacterium_g_norank_f_Muribaculaceae               | OTU346 |
| Bacteroidetes  | Muribaculaceae               | norank_f_Muribaculaceae        | uncultured_bacterium_g_norank_f_Muribaculaceae               | OTU613 |
| Bacteroidetes  | Bacteroidaceae               | Bacteroides                    | unclassified_g_Bacteroides                                   | OTU343 |
| Firmicutes     | Ruminococcaceae              | unclassified_f_Ruminococcaceae | unclassified_f_Ruminococcaceae                               | OTU83  |
| Bacteroidetes  | Muribaculaceae               | norank_f_Muribaculaceae        | uncultured_bacterium_g_norank_f_Muribaculaceae               | OTU813 |
| Firmicutes     | Ruminococcaceae              | Butyricoccus                   | uncultured_bacterium_g_Butyricoccus                          | OTU342 |
| Bacteroidetes  | Muribaculaceae               | norank_f_Muribaculaceae        | uncultured_Bacteroidales_bacterium_g_norank_f_Muribaculaceae | OTU535 |
| Firmicutes     | Ruminococcaceae              | Ruminiclostridium_9            | uncultured_bacterium_g_Ruminiclostridium_9                   | OTU391 |
| Bacteroidetes  | Prevotellaceae               | unclassified_f_Prevotellaceae  | unclassified_f_Prevotellaceae                                | OTU142 |
| Firmicutes     | Ruminococcaceae              | Oscillibacter                  | uncultured_bacterium_g_Oscillibacter                         | OTU317 |
| Bacteroidetes  | Muribaculaceae               | norank_f_Muribaculaceae        | uncultured_bacterium_g_norank_f_Muribaculaceae               | OTU468 |
| Bacteroidetes  | Prevotellaceae               | Prevotellaceae_UCG-001         | uncultured_Bacteroidales_bacterium_g_Prevotellaceae_UCG-001  | OTU715 |
| Firmicutes     | Ruminococcaceae              | GCA-900066225                  | unclassified_g_GCA-900066225                                 | OTU412 |
| Bacteroidetes  | Rikenellaceae                | Alistipes                      | uncultured_bacterium_g_Alistipes                             | OTU541 |
| Bacteroidetes  | Muribaculaceae               | norank_f_Muribaculaceae        | uncultured_bacterium_g_norank_f_Muribaculaceae               | OTU80  |
| Bacteroidetes  | Muribaculaceae               | norank_f_Muribaculaceae        | uncultured_bacterium_g_norank_f_Muribaculaceae               | OTU87  |
| Firmicutes     | Lachnospiraceae              | norank_f_Lachnospiraceae       | unclassified_g_norank_f_Lachnospiraceae                      | OTU500 |
| Bacteroidetes  | Muribaculaceae               | norank_f_Muribaculaceae        | uncultured_bacterium_g_norank_f_Muribaculaceae               | OTU462 |

|                |                               |                                        |                                                               |        |
|----------------|-------------------------------|----------------------------------------|---------------------------------------------------------------|--------|
| Bacteroidetes  | Muribaculaceae                | norank_f_Muribaculaceae                | uncultured_bacterium_g_norank_f_Muribaculaceae                | OTU461 |
| Bacteroidetes  | Muribaculaceae                | norank_f_Muribaculaceae                | uncultured_bacterium_g_norank_f_Muribaculaceae                | OTU464 |
| Bacteroidetes  | Muribaculaceae                | norank_f_Muribaculaceae                | unclassified_g_norank_f_Muribaculaceae                        | OTU475 |
| Firmicutes     | Lachnospiraceae               | Lachnoclostridium                      | unclassified_g_Lachnoclostridium                              | OTU313 |
| Firmicutes     | Ruminococcaceae               | Ruminiclostridium_5                    | Ruminiclostridium_sp_KB18                                     | OTU416 |
| Bacteroidetes  | Muribaculaceae                | norank_f_Muribaculaceae                | uncultured_bacterium_g_norank_f_Muribaculaceae                | OTU388 |
| Bacteroidetes  | Muribaculaceae                | norank_f_Muribaculaceae                | uncultured_bacterium_g_norank_f_Muribaculaceae                | OTU796 |
| Firmicutes     | Lachnospiraceae               | norank_f_Lachnospiraceae               | Clostridium_sp_Culture-27                                     | OTU380 |
| Firmicutes     | Lachnospiraceae               | unclassified_f_Lachnospiraceae         | unclassified_f_Lachnospiraceae                                | OTU70  |
| Firmicutes     | Lachnospiraceae               | Lachnospiraceae_NK4A136_group          | uncultured_bacterium_g_Lachnospiraceae_NK4A136_group          | OTU172 |
| Firmicutes     | Ruminococcaceae               | [Eubacterium]_coprostanoligenes_group  | unclassified_g_[Eubacterium]_coprostanoligenes_group          | OTU430 |
| Actinobacteria | Eggerthellaceae               | Enterorhabdus                          | uncultured_bacterium_g_Enterorhabdus                          | OTU78  |
| Bacteroidetes  | Muribaculaceae                | norank_f_Muribaculaceae                | uncultured_bacterium_g_norank_f_Muribaculaceae                | OTU607 |
| Bacteroidetes  | Muribaculaceae                | norank_f_Muribaculaceae                | uncultured_bacterium_g_norank_f_Muribaculaceae                | OTU353 |
| Bacteroidetes  | unclassified_o_Bacteroidales  | unclassified_o_Bacteroidales           | unclassified_o_Bacteroidales                                  | OTU596 |
| Firmicutes     | Ruminococcaceae               | Oscillibacter                          | uncultured_bacterium_g_Oscillibacter                          | OTU293 |
| Firmicutes     | Lachnospiraceae               | unclassified_f_Lachnospiraceae         | unclassified_f_Lachnospiraceae                                | OTU396 |
| Actinobacteria | Eggerthellaceae               | Enterorhabdus                          | uncultured_bacterium_g_Enterorhabdus                          | OTU124 |
| Bacteroidetes  | Rikenellaceae                 | Alistipes                              | unclassified_g_Alistipes                                      | OTU231 |
| Firmicutes     | Lachnospiraceae               | norank_f_Lachnospiraceae               | unclassified_g_norank_f_Lachnospiraceae                       | OTU441 |
| Firmicutes     | Ruminococcaceae               | Ruminococcaceae_UCG-014                | uncultured_rumen_bacterium_g_Ruminococcaceae_UCG-014          | OTU51  |
| Bacteroidetes  | unclassified_o_Bacteroidales  | unclassified_o_Bacteroidales           | unclassified_o_Bacteroidales                                  | OTU720 |
| Firmicutes     | Lachnospiraceae               | norank_f_Lachnospiraceae               | unclassified_g_norank_f_Lachnospiraceae                       | OTU453 |
| Firmicutes     | Lactobacillaceae              | Lactobacillus                          | uncultured_bacterium_g_Lactobacillus                          | OTU303 |
| Firmicutes     | Ruminococcaceae               | Ruminococcus_1                         | unclassified_g_Ruminococcus_1                                 | OTU319 |
| Firmicutes     | Erysipelotrichaceae           | Turicibacter                           | uncultured_bacterium_g_Turicibacter                           | OTU6   |
| Firmicutes     | Ruminococcaceae               | Oscillibacter                          | [Clostridium]_leptum_g_Oscillibacter                          | OTU283 |
| Bacteroidetes  | Muribaculaceae                | norank_f_Muribaculaceae                | uncultured_bacterium_g_norank_f_Muribaculaceae                | OTU420 |
| Firmicutes     | Erysipelotrichaceae           | Erysipelatoclostridium                 | uncultured_bacterium_g_Erysipelatoclostridium                 | OTU27  |
| Bacteroidetes  | Muribaculaceae                | norank_f_Muribaculaceae                | uncultured_bacterium_g_norank_f_Muribaculaceae                | OTU429 |
| Bacteroidetes  | Muribaculaceae                | norank_f_Muribaculaceae                | uncultured_Bacteroidales_bacterium_g_norank_f_Muribaculaceae  | OTU4   |
| Firmicutes     | Ruminococcaceae               | Ruminococcaceae_UCG-010                | uncultured_organism_g_Ruminococcaceae_UCG-010                 | OTU263 |
| Bacteroidetes  | Muribaculaceae                | norank_f_Muribaculaceae                | uncultured_Bacteroidales_bacterium_g_norank_f_Muribaculaceae  | OTU9   |
| Firmicutes     | Clostridiales_vadinBB60_group | norank_f_Clostridiales_vadinBB60_group | unclassified_g_norank_f_Clostridiales_vadinBB60_group         | OTU212 |
| Bacteroidetes  | Muribaculaceae                | norank_f_Muribaculaceae                | uncultured_bacterium_g_norank_f_Muribaculaceae                | OTU102 |
| Bacteroidetes  | Muribaculaceae                | norank_f_Muribaculaceae                | uncultured_bacterium_g_norank_f_Muribaculaceae                | OTU109 |
| Bacteroidetes  | Muribaculaceae                | norank_f_Muribaculaceae                | uncultured_bacterium_g_norank_f_Muribaculaceae                | OTU108 |
| Firmicutes     | Clostridiales_vadinBB60_group | norank_f_Clostridiales_vadinBB60_group | uncultured_bacterium_g_norank_f_Clostridiales_vadinBB60_group | OTU187 |

|                   |                              |                                       |                                                                    |        |
|-------------------|------------------------------|---------------------------------------|--------------------------------------------------------------------|--------|
| Firmicutes        | Peptococcaceae               | norank_f_Peptococcaceae               | unclassified_g_norank_f_Peptococcaceae                             | OTU638 |
| Firmicutes        | Lachnospiraceae              | Lachnospiraceae_NK4A136_group         | unclassified_g_Lachnospiraceae_NK4A136_group                       | OTU281 |
| Bacteroidetes     | Muribaculaceae               | norank_f_Muribaculaceae               | uncultured_bacterium_g_norank_f_Muribaculaceae                     | OTU197 |
| Bacteroidetes     | Muribaculaceae               | norank_f_Muribaculaceae               | uncultured_bacterium_g_norank_f_Muribaculaceae                     | OTU190 |
| Bacteroidetes     | Muribaculaceae               | norank_f_Muribaculaceae               | uncultured_bacterium_g_norank_f_Muribaculaceae                     | OTU150 |
| Bacteroidetes     | Muribaculaceae               | Muribaculum                           | uncultured_bacterium_g_Muribaculum                                 | OTU557 |
| Bacteroidetes     | Rikenellaceae                | Alistipes                             | uncultured_bacterium_g_Alistipes                                   | OTU602 |
| Bacteroidetes     | Muribaculaceae               | norank_f_Muribaculaceae               | unclassified_g_norank_f_Muribaculaceae                             | OTU556 |
| Bacteroidetes     | Muribaculaceae               | norank_f_Muribaculaceae               | uncultured_bacterium_g_norank_f_Muribaculaceae                     | OTU639 |
| Epsilonbacteraeot | Helicobacteraceae            | Helicobacter                          | unclassified_g_Helicobacter                                        | OTU747 |
| Firmicutes        | Lactobacillaceae             | Lactobacillus                         | unclassified_g_Lactobacillus                                       | OTU177 |
| Firmicutes        | Lachnospiraceae              | [Eubacterium]_xylanophilum_group      | uncultured_bacterium_g_[Eubacterium]_xylanophilum_group            | OTU393 |
| Bacteroidetes     | unclassified_o_Bacteroidales | unclassified_o_Bacteroidales          | unclassified_o_Bacteroidales                                       | OTU25  |
| Firmicutes        | Lachnospiraceae              | Lachnospiraceae_NK4A136_group         | uncultured_bacterium_g_Lachnospiraceae_NK4A136_group               | OTU334 |
| Firmicutes        | Peptococcaceae               | norank_f_Peptococcaceae               | unclassified_g_norank_f_Peptococcaceae                             | OTU354 |
| Bacteroidetes     | Muribaculaceae               | norank_f_Muribaculaceae               | uncultured_bacterium_g_norank_f_Muribaculaceae                     | OTU804 |
| Cyanobacteria     | norank_o_Gastranaerophilales | norank_f_norank_o_Gastranaerophilales | uncultured_bacterium_g_norank_f_norank_o_Gastranaerophilales       | OTU728 |
| Bacteroidetes     | Tannerellaceae               | Parabacteroides                       | unclassified_g_Parabacteroides                                     | OTU305 |
| Firmicutes        | Lachnospiraceae              | Blautia                               | unclassified_g_Blautia                                             | OTU297 |
| Firmicutes        | Lachnospiraceae              | ASF356                                | uncultured_bacterium_g_ASF356                                      | OTU642 |
| Deferribacteres   | Deferribacteraceae           | Mucispirillum                         | uncultured_bacterium_g_Mucispirillum                               | OTU881 |
| Firmicutes        | Lachnospiraceae              | Lachnospiraceae_NK4A136_group         | uncultured_Clostridiales_bacterium_g_Lachnospiraceae_NK4A136_group | OTU201 |
| Firmicutes        | Erysipelotrichaceae          | norank_f_Erysipelotrichaceae          | unclassified_g_norank_f_Erysipelotrichaceae                        | OTU636 |
| Bacteroidetes     | Muribaculaceae               | norank_f_Muribaculaceae               | uncultured_bacterium_g_norank_f_Muribaculaceae                     | OTU443 |
| Firmicutes        | Ruminococcaceae              | Ruminiclostridium_6                   | uncultured_bacterium_g_Ruminiclostridium_6                         | OTU445 |
| Bacteroidetes     | Tannerellaceae               | Parabacteroides                       | unclassified_g_Parabacteroides                                     | OTU35  |
| Bacteroidetes     | Muribaculaceae               | norank_f_Muribaculaceae               | uncultured_bacterium_g_norank_f_Muribaculaceae                     | OTU560 |
| Actinobacteria    | Eggerthellaceae              | Enterorhabdus                         | uncultured_bacterium_g_Enterorhabdus                               | OTU447 |
| Bacteroidetes     | Prevotellaceae               | Prevotellaceae_UCG-001                | uncultured_Bacteroidales_bacterium_g_Prevotellaceae_UCG-001        | OTU608 |
| Bacteroidetes     | unclassified_o_Bacteroidales | unclassified_o_Bacteroidales          | unclassified_o_Bacteroidales                                       | OTU455 |
| Firmicutes        | Ruminococcaceae              | Anaerotruncus                         | uncultured_bacterium_g_Anaerotruncus                               | OTU449 |
| Bacteroidetes     | Muribaculaceae               | norank_f_Muribaculaceae               | uncultured_Bacteroidales_bacterium_g_norank_f_Muribaculaceae       | OTU43  |
| Bacteroidetes     | Muribaculaceae               | norank_f_Muribaculaceae               | uncultured_bacterium_g_norank_f_Muribaculaceae                     | OTU206 |
| Bacteroidetes     | Prevotellaceae               | unclassified_f_Prevotellaceae         | unclassified_f_Prevotellaceae                                      | OTU57  |
| Proteobacteria    | Burkholderiaceae             | Oligella                              | Oligella_ureolytica                                                | OTU97  |
| Bacteroidetes     | Rikenellaceae                | Rikenella                             | uncultured_bacterium_g_Rikenella                                   | OTU603 |
| Firmicutes        | Lachnospiraceae              | unclassified_f_Lachnospiraceae        | unclassified_f_Lachnospiraceae                                     | OTU349 |
| Bacteroidetes     | Muribaculaceae               | norank_f_Muribaculaceae               | uncultured_bacterium_g_norank_f_Muribaculaceae                     | OTU42  |

|                 |                               |                                        |                                                               |        |
|-----------------|-------------------------------|----------------------------------------|---------------------------------------------------------------|--------|
| Bacteroidetes   | Muribaculaceae                | norank_f_Muribaculaceae                | uncultured_bacterium_g_norank_f_Muribaculaceae                | OTU41  |
| Bacteroidetes   | Tannerellaceae                | Parabacteroides                        | unclassified_g_Parabacteroides                                | OTU132 |
| Bacteroidetes   | Marinifilaceae                | Odoribacter                            | unclassified_g_Odoribacter                                    | OTU637 |
| Bacteroidetes   | Muribaculaceae                | norank_f_Muribaculaceae                | uncultured_bacterium_g_norank_f_Muribaculaceae                | OTU39  |
| Firmicutes      | Erysipelotrichaceae           | norank_f_Erysipelotrichaceae           | unclassified_g_norank_f_Erysipelotrichaceae                   | OTU436 |
| Firmicutes      | Ruminococcaceae               | Ruminococcaceae_UCG-014                | unclassified_g_Ruminococcaceae_UCG-014                        | OTU382 |
| Bacteroidetes   | Muribaculaceae                | norank_f_Muribaculaceae                | uncultured_bacterium_g_norank_f_Muribaculaceae                | OTU401 |
| Firmicutes      | Clostridiales_vadinBB60_group | norank_f_Clostridiales_vadinBB60_group | unclassified_g_norank_f_Clostridiales_vadinBB60_group         | OTU271 |
| Actinobacteria  | Eggerthellaceae               | unclassified_f_Eggerthellaceae         | unclassified_f_Eggerthellaceae                                | OTU141 |
| Firmicutes      | Ruminococcaceae               | Ruminococcaceae_UCG-013                | unclassified_g_Ruminococcaceae_UCG-013                        | OTU463 |
| Firmicutes      | Lachnospiraceae               | norank_f_Lachnospiraceae               | Clostridium_sp._Culture-54                                    | OTU241 |
| Bacteroidetes   | Prevotellaceae                | unclassified_f_Prevotellaceae          | unclassified_f_Prevotellaceae                                 | OTU159 |
| Patescibacteria | Saccharimonadaceae            | Candidatus_Saccharimonas               | uncultured_bacterium_g_Candidatus_Saccharimonas               | OTU446 |
| Firmicutes      | Ruminococcaceae               | Ruminococcaceae_UCG-010                | unclassified_g_Ruminococcaceae_UCG-010                        | OTU440 |
| Bacteroidetes   | Muribaculaceae                | norank_f_Muribaculaceae                | unclassified_g_norank_f_Muribaculaceae                        | OTU411 |
| Firmicutes      | Lachnospiraceae               | Lachnospiraceae_UCG-006                | unclassified_g_Lachnospiraceae_UCG-006                        | OTU705 |
| Bacteroidetes   | Muribaculaceae                | norank_f_Muribaculaceae                | unclassified_g_norank_f_Muribaculaceae                        | OTU56  |
| Firmicutes      | Lachnospiraceae               | Tyzzarella                             | uncultured_bacterium_g_Tyzzarella                             | OTU312 |
| Firmicutes      | Clostridiales_vadinBB60_group | norank_f_Clostridiales_vadinBB60_group | uncultured_bacterium_g_norank_f_Clostridiales_vadinBB60_group | OTU243 |
| Bacteroidetes   | Muribaculaceae                | norank_f_Muribaculaceae                | uncultured_bacterium_g_norank_f_Muribaculaceae                | OTU48  |
| Actinobacteria  | Eggerthellaceae               | DNF00809                               | uncultured_bacterium_g_DNF00809                               | OTU710 |
| Bacteroidetes   | Muribaculaceae                | norank_f_Muribaculaceae                | uncultured_bacterium_g_norank_f_Muribaculaceae                | OTU621 |
| Firmicutes      | Lachnospiraceae               | unclassified_f_Lachnospiraceae         | unclassified_f_Lachnospiraceae                                | OTU615 |
| Firmicutes      | Lachnospiraceae               | unclassified_f_Lachnospiraceae         | unclassified_f_Lachnospiraceae                                | OTU612 |
| Bacteroidetes   | Muribaculaceae                | norank_f_Muribaculaceae                | uncultured_bacterium_g_norank_f_Muribaculaceae                | OTU582 |
| Firmicutes      | Lachnospiraceae               | norank_f_Lachnospiraceae               | Clostridium_sp._Clone-17                                      | OTU473 |
| Firmicutes      | Lachnospiraceae               | norank_f_Lachnospiraceae               | unclassified_g_norank_f_Lachnospiraceae                       | OTU456 |
| Firmicutes      | Lachnospiraceae               | norank_f_Lachnospiraceae               | unclassified_g_norank_f_Lachnospiraceae                       | OTU459 |
| Bacteroidetes   | Bacteroidaceae                | Bacteroides                            | unclassified_g_Bacteroides                                    | OTU559 |
| Firmicutes      | Lachnospiraceae               | Lachnoclostridium                      | unclassified_g_Lachnoclostridium                              | OTU315 |
| Bacteroidetes   | Muribaculaceae                | norank_f_Muribaculaceae                | uncultured_Barnesiella_sp._g_norank                           | OTU113 |
| Bacteroidetes   | Muribaculaceae                | norank_f_Muribaculaceae                | uncultured_bacterium_g_norank_f_Muribaculaceae                | OTU71  |
| Actinobacteria  | Eggerthellaceae               | Enterorhabdus                          | unclassified_g_Enterorhabdus                                  | OTU330 |
| Bacteroidetes   | Muribaculaceae                | norank_f_Muribaculaceae                | uncultured_bacterium_g_norank_f_Muribaculaceae                | OTU537 |
| Bacteroidetes   | Muribaculaceae                | norank_f_Muribaculaceae                | uncultured_bacterium_g_norank_f_Muribaculaceae                | OTU28  |
| Firmicutes      | Ruminococcaceae               | norank_f_Ruminococcaceae               | unclassified_g_norank_f_Ruminococcaceae                       | OTU299 |
| Bacteroidetes   | Muribaculaceae                | norank_f_Muribaculaceae                | unclassified_g_norank_f_Muribaculaceae                        | OTU593 |
| Bacteroidetes   | Muribaculaceae                | norank_f_Muribaculaceae                | uncultured_bacterium_g_norank_f_Muribaculaceae                | OTU96  |

|                |                              |                                |                                                                        |        |
|----------------|------------------------------|--------------------------------|------------------------------------------------------------------------|--------|
| Bacteroidetes  | Muribaculaceae               | norank_f_Muribaculaceae        | uncultured_bacterium_g_norank_f_Muribaculaceae                         | OTU90  |
| Proteobacteria | Moraxellaceae                | Psychrobacter                  | unclassified_g_Psychrobacter                                           | OTU687 |
| Actinobacteria | Eggerthellaceae              | Enterorhabdus                  | uncultured_bacterium_g_Enterorhabdus                                   | OTU451 |
| Bacteroidetes  | unclassified_o_Bacteroidales | unclassified_o_Bacteroidales   | unclassified_o_Bacteroidales                                           | OTU467 |
| Firmicutes     | Ruminococcaceae              | Ruminococcaceae_UCG-010        | unclassified_g_Ruminococcaceae_UCG-010                                 | OTU409 |
| Firmicutes     | Ruminococcaceae              | Ruminococcaceae_UCG-005        | uncultured_bacterium_g_Ruminococcaceae_UCG-005                         | OTU344 |
| Firmicutes     | Ruminococcaceae              | Ruminiclostridium_6            | uncultured_bacterium_g_Ruminiclostridium_6                             | OTU474 |
| Firmicutes     | Ruminococcaceae              | Ruminiclostridium_9            | unclassified_g_Ruminiclostridium_9                                     | OTU833 |
| Bacteroidetes  | Rikenellaceae                | Alistipes                      | uncultured_bacterium_g_Alistipes                                       | OTU491 |
| Bacteroidetes  | Muribaculaceae               | norank_f_Muribaculaceae        | uncultured_bacterium_g_norank_f_Muribaculaceae                         | OTU331 |
| Firmicutes     | Clostridiaceae_1             | Candidatus_Arthromitus         | Candidatus_Arthromitus_sp._SFB-mouse-Japan                             | OTU545 |
| Firmicutes     | Ruminococcaceae              | unclassified_f_Ruminococcaceae | unclassified_f_Ruminococcaceae                                         | OTU650 |
| Firmicutes     | Ruminococcaceae              | unclassified_f_Ruminococcaceae | unclassified_f_Ruminococcaceae                                         | OTU651 |
| Bacteroidetes  | Muribaculaceae               | norank_f_Muribaculaceae        | unclassified_g_norank_f_Muribaculaceae                                 | OTU69  |
| Bacteroidetes  | Rikenellaceae                | Alistipes                      | unclassified_g_Alistipes                                               | OTU19  |
| Firmicutes     | Lachnospiraceae              | unclassified_f_Lachnospiraceae | unclassified_f_Lachnospiraceae                                         | OTU657 |
| Bacteroidetes  | Marinifilaceae               | Odoribacter                    | unclassified_g_Odoribacter                                             | OTU431 |
| Bacteroidetes  | Rikenellaceae                | Alistipes                      | uncultured_bacterium_g_Alistipes                                       | OTU584 |
| Bacteroidetes  | Prevotellaceae               | unclassified_f_Prevotellaceae  | unclassified_f_Prevotellaceae                                          | OTU435 |
| Firmicutes     | Ruminococcaceae              | norank_f_Ruminococcaceae       | unclassified_g_norank_f_Ruminococcaceae                                | OTU581 |
| Firmicutes     | Lachnospiraceae              | Roseburia                      | unclassified_g_Roseburia                                               | OTU439 |
| Firmicutes     | Lachnospiraceae              | norank_f_Lachnospiraceae       | uncultured_bacterium_g_norank_f_Lachnospiraceae                        | OTU712 |
| Firmicutes     | Christensenellaceae          | Christensenellaceae_R-7_group  | uncultured_rumen_bacterium_g_Christensenellaceae_R-7_group             | OTU199 |
| Proteobacteria | Desulfovibrionaceae          | norank_f_Desulfovibrionaceae   | uncultured_Desulfovibrionales_bacterium_g_norank_f_Desulfovibrionaceae | OTU216 |
| Firmicutes     | Lachnospiraceae              | Lachnospiraceae_UCG-001        | uncultured_bacterium_g_Lachnospiraceae_UCG-001                         | OTU508 |
| Firmicutes     | Lachnospiraceae              | GCA-900066575                  | uncultured_bacterium_g_GCA-900066575                                   | OTU384 |
| Firmicutes     | Lachnospiraceae              | norank_f_Lachnospiraceae       | uncultured_bacterium_g_norank_f_Lachnospiraceae                        | OTU713 |
| Bacteroidetes  | Muribaculaceae               | norank_f_Muribaculaceae        | uncultured_bacterium_g_norank_f_Muribaculaceae                         | OTU550 |
| Bacteroidetes  | Prevotellaceae               | Alloprevotella                 | gut_metagenome_g_Alloprevotella                                        | OTU356 |
| Firmicutes     | Ruminococcaceae              | Ruminococcaceae_NK4A214_group  | uncultured_bacterium_g_Ruminococcaceae_NK4A214_group                   | OTU359 |
| Firmicutes     | Ruminococcaceae              | Ruminiclostridium              | uncultured_bacterium_g_Ruminiclostridium                               | OTU321 |
| Bacteroidetes  | Rikenellaceae                | Rikenellaceae_RC9_gut_group    | unclassified_g_Rikenellaceae_RC9_gut_group                             | OTU36  |
| Bacteroidetes  | Muribaculaceae               | norank_f_Muribaculaceae        | uncultured_bacterium_g_norank_f_Muribaculaceae                         | OTU433 |
| Firmicutes     | Lachnospiraceae              | Blautia                        | Blautia_coccoides_g_Blautia                                            | OTU268 |
| Firmicutes     | Lachnospiraceae              | Lachnospiraceae_NK4A136_group  | unclassified_g_Lachnospiraceae_NK4A136_group                           | OTU714 |
| Firmicutes     | Lachnospiraceae              | Blautia                        | unclassified_g_Blautia                                                 | OTU327 |
| Firmicutes     | Ruminococcaceae              | Ruminococcaceae_NK4A214_group  | unclassified_g_Ruminococcaceae_NK4A214_group                           | OTU114 |
| Firmicutes     | Ruminococcaceae              | Ruminococcaceae_UCG-013        | unclassified_g_Ruminococcaceae_UCG-013                                 | OTU250 |

|               |                               |                                         |                                                              |        |
|---------------|-------------------------------|-----------------------------------------|--------------------------------------------------------------|--------|
| Bacteroidetes | Marinifilaceae                | Odoribacter                             | uncultured_bacterium_g__Odoribacter                          | OTU554 |
| Bacteroidetes | Muribaculaceae                | norank_f__Muribaculaceae                | uncultured_bacterium_g__norank_f__Muribaculaceae             | OTU273 |
| Firmicutes    | Clostridiales_vadinBB60_group | norank_f__Clostridiales_vadinBB60_group | unclassified_g__norank_f__Clostridiales_vadinBB60_group      | OTU644 |
| Bacteroidetes | Muribaculaceae                | norank_f__Muribaculaceae                | uncultured_bacterium_g__norank_f__Muribaculaceae             | OTU786 |
| Bacteroidetes | Rikenellaceae                 | Rikenellaceae_RC9_gut_group             | unclassified_g__Rikenellaceae_RC9_gut_group                  | OTU383 |
| Firmicutes    | Ruminococcaceae               | Ruminiclostridium                       | unclassified_g__Ruminiclostridium                            | OTU488 |
| Bacteroidetes | Muribaculaceae                | norank_f__Muribaculaceae                | uncultured_bacterium_g__norank_f__Muribaculaceae             | OTU655 |
| Firmicutes    | Lachnospiraceae               | norank_f__Lachnospiraceae               | uncultured_bacterium_g__norank_f__Lachnospiraceae            | OTU387 |
| Firmicutes    | Erysipelotrichaceae           | norank_f__Erysipelotrichaceae           | uncultured_bacterium_g__norank_f__Erysipelotrichaceae        | OTU652 |
| Bacteroidetes | Rikenellaceae                 | Rikenellaceae_RC9_gut_group             | uncultured_bacterium_g__Rikenellaceae_RC9_gut_group          | OTU771 |
| Firmicutes    | Lachnospiraceae               | unclassified_f__Lachnospiraceae         | unclassified_f__Lachnospiraceae                              | OTU437 |
| Firmicutes    | Ruminococcaceae               | Ruminiclostridium_9                     | uncultured_bacterium_g__Ruminiclostridium_9                  | OTU122 |
| Firmicutes    | Clostridiales_vadinBB60_group | norank_f__Clostridiales_vadinBB60_group | unclassified_g__norank_f__Clostridiales_vadinBB60_group      | OTU936 |
| Firmicutes    | Ruminococcaceae               | Ruminococcaceae_UCG-014                 | unclassified_g__Ruminococcaceae_UCG-014                      | OTU282 |
| Bacteroidetes | Prevotellaceae                | Prevotellaceae_UCG-001                  | uncultured_Bacteroidales_bacterium_g__Prevotellaceae_UCG-001 | OTU193 |
